# Supplementary material
Source: publisher site journal article supplement (https://www.dovepress.com/get_supplementary_file.php?f=242009.docx)
Supplement: Supplementary file 1 [file get_supplementary_file.php]

**Supplementary table 1.** Conclusions on extrapulmonary manifestations of COPD and comorbidities

| **Conclusions (C) and Recommendations (R)** | | **Final results** | **Level of evidence (LE)/Grade of recommendation (GR)** | **Source** |
| --- | --- | --- | --- | --- |
| **Comorbidities** | | | | |
|  | | | | |
|  | The sustained presence of low grade systemic inflammation in COPD contributes to the emergence and development of comorbidities. | **Unanimity**  *1st round* | 5D | *References*  *1-3* |

**Supplementary table 2.** Conclusions and recommendations on the clinical consequences and treatment of cardiovascular risk factors in COPD patients

| **Conclusions (C) and Recommendations (R)** | | **Final results** | **Level of evidence (LE)/Grade of recommendation (GR)** | **Source** |
| --- | --- | --- | --- | --- |
| **A) OBESITY** | | | | |
| **Consequences of obesity in COPD** | | | | |
|  | Obesity in COPD patients causes respiratory function changes that lead to worse quality of life, reduced exercise tolerance, and greater use of health care resources. | **Unanimity**  *1st round* | 2 | *References: 4-6* |
|  | Patients with COPD and obesity should receive recommendations for weight control. | **Unanimity**  *1st round* | 5 D | *Compiled by authors*  *Expert opinion* |
|  | Patients with low body weight should receive recommendations on nutrition and physical activity aimed at gaining weight and muscle mass, given the association between low BMI and mortality. | **Consensus**  **(97.5%)**  *1st round* | 5 D | *Compiled by authors*  *Reference****: 7*** |
| **Treatment of patients with COPD and obesity** | | | | |
|  | Systemic corticosteroids can contribute to weight gain if used for extended periods of time. | **Unanimity**  *1st round* | 2 | *Reference:8* |
|  | Roflumilast can cause weight loss. | **Consensus**  **(95.7%)**  *1st round* | 1 | *Reference:9 LE: 1* |
|  | All lifestyle and dietary modifications and pharmacological treatments that contribute to optimum control of excess weight are recommended. | **Unanimity**  *1st round* | 5 D | *Compiled by authors*  *Expert opinion* |
|  | Pulmonary rehabilitation programs are recommended in patients with COPD and obesity. | **Unanimity**  *1st round* | 5 D | *Adapted from 10 References: 11,12* |
| **B) ARTERIAL HYPERTENSION (AHT)** | | | | |
| **Consequences of AHT in COPD** | | | | |
|  | A comprehensive evaluation must be performed to detect risk factors associated with COPD and AHT in all patients with both diseases, since these conditions will foster the development of cardiovascular diseases, such as ischemic heart disease and congestive heart failure, that worsen the prognosis of COPD patients. | **Consensus**  **(95.7%)**  *1st round* | 5 D | *Adapted from 10 Reference: 13* |
| **Treatment of patients with COPD and AHT** | | | | |
|  | Bronchodilators (long acting muscarinic antagonists and long acting beta agonists) are safe and well tolerated in hypertensive patients with COPD. | **Unanimity**  *1st round* | 5 | *Reference: 14* |
|  | Treatment of AHT is the same in patients with and without COPD, and COPD treatment is the same in patients with and without AHT. | **Unanimity**  *1st round* | 5 | *Expert opinion* |
|  | The use of beta-blockers, especially cardioselective agents, is recommended in hypertensive patients with COPD and ischemic heart disease or heart failure. | **Unanimity**  *1st round* | 2 B | *Adapted from 15 References: 16,17* |
|  | Cardioselective beta-blockers should not be suspended during acute COPD exacerbations. | **Consensus**  **(91.3%)**  *1st round* | 2 B | *Compiled by authors*  *Reference: 18* |
|  | In patients with COPD and AHT, antihypertensive treatment with angiotensin converting enzyme inhibitors and angiotensin receptor II blockerss is recommended. | **Consensus**  **(91.3%)**  *1st round* | 5 D | *Adapted from 10 Expert opinion* |
|  | COPD should be treated according to standard clinical practice guideline recommendations, since there is no direct evidence that COPD should be treated differently in the presence of hypertension. | **Unanimity**  *1st round* | 5 D | *Compiled by authors*  *Expert opinion* |
| **C) DIABETES MELLITUS (DM)** | | | | |
| **Consequences of DM in COPD** | | | | |
|  | Diabetes mellitus is associated with worse quality of life, shorter time until first hospitalization, longer hospital stays, and increased mortality. | **Unanimity**  *1st round* | 2 | *References: 19-29* |
|  | In patients with COPD and obesity or other cardiovascular risk factors, the presence of diabetes mellitus should be ruled out, due to its impact on quality of life, COPD progress, and reduced survival. | **Unanimity**  *1st round* | 2 C | *Compiled by authors*  *References: 19-29* |
|  | As in any patient with DM, in patients with COPD and DM, glycated hemoglobin (HbA1c) must be determined periodically in order to maintain an optimal degree of glycemic control, due to the increased relative risk of death or prolonged length of hospital stay associated with high blood glucose. | **Unanimity**  *1st round* | 2 C | *Compiled by authors*  *References: 13,28-30* |
| **Treatment of patients with COPD and DM** | | | | |
|  | Low-dose inhaled corticosteroids, when indicated, do not increase the risk of developing DM in patients with COPD. | **Consensus**  **(87.0%)**  *1st round* | 2 | *References: 31* |
|  | Blood glucose should be monitored in patients with COPD who receive treatment with systemic corticosteroids, due to the increased risk of development of hyperglycemia. | **Consensus**  **(87.0%)**  *1st round* | 2 B | *Compiled by authors*  *Reference: 32* |
|  | As any patient with DM, glomerular filtration rate should be evaluated periodically to adjust the dose of antidiabetic drugs in patients with COPD and diabetes mellitus. | **Unanimity**  *1st round* | 5 D | *Compiled by authors*  *Reference* |
|  | Metformin, if tolerated and not contraindicated, is the first drug of choice for patients with COPD and DM. | **Consensus**  **(91.3%)**  *1st round* | 4 C | *Compiled by authors*  *References: 33,34* |
|  | COPD in the presence of DM should be treated according to standard clinical practice guideline recommendations, since there is no direct evidence that these patients need to be treated differently, in spite of increasing dyspnea or a greater predisposition to exacerbations that might be a result of this comorbidity. | **Consensus**  **(95.7%)**  *1st round* | 5 D | *Compiled by authors*  *Reference: 35* |
| **D) DYSLIPIDEMIA** | | | | |
| **Consequences of dyslipidemia in COPD patient** | | | | |
|  | Available evidence on the role of dyslipidemia in COPD is still insufficient to establish specific findings on the consequences of this comorbidity in these patients. | **Consensus**  **(82.6%)**  *1st round* | **-** | *Expert opinion* |
| **Treatment of patients with COPD and dyslipidemia** | | | | |
|  | Overall, it seems that COPD patients who benefit most from treatment with statins are those who have concomitant cardiovascular disease. | **Consensus**  **(95.7%)**  *1st round* | 1 | *Reference: 36* |
|  | The clinical benefit of statins in COPD patients who do not have other risk factors for cardiovascular disease is not currently established. | **Consensus**  **(87.0%)**  *1st round* | - | - |
|  | All patients with COPD and cardiovascular disease should receive statins according to clinical practice guideline recommendations. | **Unanimity**  *1st round* | 5 D | *Compiled by authors*  *Expert opinion* |
|  | COPD patients should receive the treatment recommended in the clinical practice guidelines regardless of whether they have concomitant dyslipidemia or not, and vice versa. | **Consensus (95.7%)**  *1st round* | 5 D | *Compiled by authors*  *Expert opinion* |

**Supplementary table 3.** Conclusions and recommendations on the clinical consequences and treatment of cardiovascular comorbidities in COPD patients

| **Conclusions (C) and Recommendations (R)** | | | **Final results** | **Level of evidence (LE)/ Grade of evidence (GR)** | **Source** |
| --- | --- | --- | --- | --- | --- |
| **A) HEART FAILURE (HF)** | | | | | |
| **Consequences of HF in COPD** | | | | | |
|  | | Health-related quality of life is worse in patients with COPD who have concomitant HF. | **Unanimity**  *1st round* | 1 | *References: 37,38* |
|  | | HF worsens the prognosis of patients with COPD, in terms of new exacerbations, hospitalizations, and death rates. | **Unanimity**  *1st round* | 2 | *References: 39-42* |
|  | | Raised natriuretic peptide levels are associated with increased mortality in patients with COPD. | **Consensus**  **(82.6%)**  *1st round* | 1 | *Reference: 43* |
|  | | Since the prevalence of HF is higher in patients with COPD, and confers a worse prognosis, ruling out the presence of HF is recommended. | **Unanimity**  *1st round* | 2 C | *Compiled by authors*  *References: 39-42,44-47* |
|  | | If HF is suspected in patients with COPD, natriuretic peptide levels should be determined. | **Consensus**  **(95.2%)**  *2nd round* | 1 B | *Compiled by authors*  *References: 43,48-51* |
| **Treatment of patients with COPD and HF** | | | | | |
|  | | Drugs used for the treatment of HF are safe in patients with COPD. | **Unanimity**  *1st round* | 1 | *References: 52-54* |
|  | | Long-acting bronchodilators and inhaled corticosteroids are safe in patients with HF. | **Unanimity**  *1st round* | 1 | *References: 14,55-57* |
|  | | In COPD, if beta-blockers are indicated, the use of cardioselective drugs is preferred. | **Unanimity**  *1st round* | 1 B | *Compiled by authors*  *References: 52-54,58* |
|  | | COPD patients should receive the treatment recommended in the guidelines regardless of whether they have concomitant HF or not, and vice versa. | **Unanimity**  **(90.5%)**  *2nd round* | 5 D | *Compiled by authors*  *References: 55,59* |
| **B) ISCHEMIC HEART DISEASE (IHD)** | | | | | |
| **Consequences of IHD in COPD** | | | | | |
|  | | The presence of IHD worsens health-related quality of life in patients with COPD. | **Unanimity**  *1st round* | 1 | *References: 52,60-62* |
|  | | IHD increases the risk of hospitalization and mortality in patients with COPD. | **Consensus**  **(95.7%)**  *1st round* | 1 | *References:* **39,63,64** |
|  | | In all patients with COPD, the possibility of IHD should be ruled out, since this comorbidity worsens patient prognosis. | **Consensus**  **(81.0%)**  *2nd round* | 1 A | *Compiled by authors*  *Reference:* ***52*** |
| **Treatment of patients with COPD and ischemic heart disease** | | | | | |
|  | | The treatment of COPD is safe in patients with IHD. | **Consensus**  **(95.7%)**  *1st round* | 1 | *References****:*** 65-68 |
|  | | The treatment of COPD is associated with a decrease in cardiovascular mortality in epidemiological studies and in some clinical trials, although this could not be demonstrated in studies where mortality was the main variable. | **Consensus**  **(87.0%)**  *1st round* | 2 | *References:*56,69-75 |
|  | | Cardiovascular drugs are safe in patients with COPD. | **Unanimity**  *1st round* | 1 | *References:*  *72,76-79* |
|  | | Since the safety and effectiveness of drugs for IHD and COPD are not modified in patients with both diseases, the presence of IHD does not require a modification of the COPD treatment recommended in the clinical practice guidelines, and vice versa. | **Consensus**  **(91.3%)**  *1st round* | 2 B | *Compiled by authors*  *References:**14,35* |
| **C) PERIPHERAL ARTERY DISEASE (PAD)** | | | | | |
| **Consequences of PAD in COPD** | | | | | |
|  | | The presence of PAD in COPD patients is associated with a poorer quality of life and reduced exercise tolerance compared with COPD patients without PAD. | **Unanimity**  *1st round* | 1 | *Reference: 80* |
|  | | Mortality of COPD patients is increased in the presence of PAD. | **Consensus**  **(95.7%)**  *1st round* | 3 | *References: 39,81* |
|  | | Due to lack of evidence, no conclusion can be made regarding the effect of PAD on the disease course of COPD patients. | **Consensus**  **(87.0%)**  *1st round* | - | - |
|  | | The presence of PAD should be ruled out in COPD patients because it is associated with worse quality of life, lower exercise tolerance, and increased mortality. | **Consensus**  **(91.3%)**  *1st round* | 1 | *Compiled by authors*  *References:**39,80,81* |
| **Treatment of COPD patients with PAD** | | | | | |
|  | | The treatment of COPD is safe in patients with PAD. | **Unanimity**  *1st round* | 1 | *References: 82,83* |
|  | | Lifestyle and dietary measures and abstinence from smoking are recommended for both PAD and COPD. | **Unanimity**  *1st round* | 1 | *Reference: 84* |
|  | | The use of statins and beta-blockers in patients with PAD and concomitant COPD is safe. | **Consensus**  **(95.7%)**  *1st round* | 1 | *References: 82,83* |
|  | | Patients with COPD and PAD should be treated in accordance with standard clinical practice guideline recommendations, since there is no evidence that the presence of PAD alters the treatment for COPD. | **Unanimity**  *1st round* | 5 D | *Compiled by authors*  *Expert opinion* |
| **D) ATRIAL FIBRILLATION (AF)** | | | | | |
| **Consequences of AF in COPD** | | | | | |
|  | AF worsens quality of life in COPD patients. | | **Unanimity**  *1st round* | 1 | *References: 85* |
|  | AF increases the risk of hospitalization and mortality in patients with COPD. | | **Unanimity**  *1st round* | 1 | *References: 39,86-89* |
|  | AF can cause COPD exacerbation. | | **Consensus**  **(85.7%)**  *2nd round* | 1 | *Reference: 90* |
| **Treatment of patients with COPD and AF** | | | | | |
|  | Inhaled bronchodilators at standard doses are safe in patients with COPD and AF. | | **Consensus**  **(91.3%)**  *1st round* | 1 | *References: 14,35* |
|  | The treatment of AF does not differ in patients with concomitant COPD. | | **Consensus**  **(91.3%)**  *1st round* | 5 | *References: 14,35* |
|  | Bronchodilators and inhaled corticosteroids should be used at standard doses in patients with COPD and AF. | | **Consensus**  **(82.6%)**  *1st round* | 5 D | *Compiled by authors*  *Reference:91* |
|  | High doses of short acting beta agosnists and theophylline should be avoided, as these can trigger AF or worsen control of the ventricular rate. | | **Consensus**  **(95.7%)**  *1st round* | 1 A | *Compiled by authors*  *Reference:92* |
|  | The use of beta-blockers in COPD exacerbations is not contraindicated, although cardioselective agents are always recommended. | | **Unanimity**  *1st round* | 1 A | *Adopted from 10 References: 35,93* |

**Supplementary table 4.** Conclusions and recommendations on the clinical consequences and treatment of neuropsychiatric comorbidities in COPD patients

| **Conclusions (C) and Recommendations (R)** | | **Final results** | **Level of evidence (LE)/ Grade of evidence (GR)** | **Source** |
| --- | --- | --- | --- | --- |
| **A) ANXIETY** | | | | |
| **Consequences of anxiety in COPD** | | | | |
|  | In patients with COPD, the presence of anxiety is associated with a worse quality of life, greater frequency of exacerbations, and reduced survival. | **Consensus**  **(91.3%)**  *1st round* | 2 | *References:* ***94-99*** |
|  | The presence of anxiety is associated with worse therapeutic adherence, greater failure of pulmonary rehabilitation programs or smoking cessation, and higher healthcare costs in general. | **Unanimity**  *1st round* | 1 | *References:* ***98,100-105*** |
|  | The anxiety status of COPD patients should be assessed, due to its high impact in terms of quality of life, exacerbations, hospitalizations, and survival. | **Unanimity**  *1st round* | 2 B | *Compiled by authors*  *References: 94-99* |
|  | Anxiety assessment scales and quality of life questionnaires must be used in these patients. | **Consensus**  **(82.6%)**  *1st round* | 3 C | *Compiled by authors*  *References: 10,96,99,106* |
| **Treatment of patients with COPD and anxiety** | | | | |
| 1. **C3** | The published literature on the treatment of anxiety in patients with COPD is limited but points to the need for a multidisciplinary approach and the implementation of personalized therapeutic strategies to improve the treatment and prognosis of these patients. | **Unanimity**  *1st round* | 5 | *Expert opinion* |
|  | Antidepressants alter patients’ perception of some symptoms, such as dyspnea, and improve quality of life. | **Consensus**  **(95.7%)**  *1st round* | 2 | *Reference: 107* |
|  | Exercise can have positive effects on the psychological health of all COPD patients, including those with low or moderate levels of anxiety. | **Unanimity**  *1st round* | 3 | *Reference: 108* |
|  | The use of relaxation techniques in patients with COPD who have anxiety could have a beneficial effect on lung function and decrease anxiety levels. | **Consensus**  **(91.3%)**  *1st round* | 4 | *Reference: 109* |
|  | In patients with COPD and associated anxiety, the use of SSRIs is recommended, unless contraindicated. | **Consensus**  **(95.7%)**  *1st round* | 2 A | *Adapted from 110* |
|  | Unless contraindicated, patients with COPD and anxiety should be advised to participate in a respiratory rehabilitation program, particularly programs based on physical exercise. | **Consensus**  **(91.3%)**  *1st round* | 3 C | *Compiled by authors*  *References: 111-113* |
|  | The presence of drug-drug interactions between anti-anxiety medications and theophylline must be investigated. | **Consensus**  **(91.3%)**  *1st round* | 1 B | *Adapted from 10* |
| **B) INSOMNIA** | | | | |
| **Consequences of insomnia in COPD** | | | | |
|  | Quality of sleep in COPD patients is often poor. This not only affects quality of life but is also a risk factor for exacerbations, emergency visits, and increased all-cause mortality. | **Unanimity**  *1st round* | 2 | *References: 114-116* |
|  | COPD patients should be asked about their quality of sleep, due to the potential deleterious effects of poor quality of sleep on the course of COPD. | **Unanimity**  *1st round* | 2 C | *Compiled by authors*  *References: 114-116* |
| **Treatment of patients with COPD and insomnia** | | | | |
|  | The drugs most widely used in the treatment of insomnia are hypnotics and benzodiazepines, but these have significant respiratory adverse effects that need to be taken into account in the management of COPD and insomnia. | **Consensus**  **(91.3%)**  *1st round* | 3 | *References: 117-119* |
|  | Long-acting bronchodilators are safe in terms of quality of sleep. | **Consensus**  **(91.3%)**  *1st round* | 3 | *References: 120,121* |
|  | Indacaterol appears to reduce night-time awakenings caused by dyspnea, compared with placebo, tiotropium, and salmeterol. | **Consensus**  **(81%)**  *2nd round* | 3 | *References: 122,123* |
|  | The dose of benzodiazepines should be adjusted in patients receiving theophylline, as their effects are reduced in these patients. It should be determined if the patient is using St. John's wort concomitantly with theophylline, due to the risk of interactions. | **Consensus**  **(82.6%)**  *1st round* | 3 C | *Adapted from 10* |
|  | Insomnia in COPD patients must be treated. | **Unanimity**  *1st round* | 5 D | *Compiled by authors*  *Expert opinion* |
|  | COPD patients should receive the treatment recommended in clinical practice guidelines regardless of whether they have concomitant insomnia or not. | **Unanimity**  *1st round* | 5 D | *Compiled by authors*  *Expert opinion* |
| **C) DEPRESSION** | | | | |
| **Consequences of depression in COPD** | | | | |
|  | Patients with COPD and depression have a worse quality of life, more exacerbations, and higher mortality. | **Consensus**  **(95.7%)**  *1st round* | 1 | *References:**98,99,124,125* |
|  | Patients with COPD and depression have more functional decline and reduced exercise tolerance. | **Consensus**  **(100%)**  *1st round* | 3 | *References:**126,127* |
|  | Patients with COPD and depression show worse adherence to bronchodilator drug therapy. | **Unanimity**  *1st round* | 3 | *Reference: 102* |
|  | Patients with COPD and depression show worse adherence to respiratory rehabilitation programs. | **Unanimity**  *1st round* | 1 | *Reference:* *128* |
|  | Given the impact of depression on progress and survival, the existence of depression in patients with COPD should be ruled out at frequent intervals. | **Unanimity**  *1st round* | 5 D | *Compiled by authors*  *Expert opinion* |
| **Treatment of patients with COPD and depression** | | | | |
|  | In patients with COPD, the treatment of depression is associated with better health outcomes (fewer emergency department visits, fewer hospitalizations, less dyspnea, and better quality of life). | **Consensus**  **(95.7%)**  *1st round* | 3 | *References: 129,130* |
|  | Antidepressants are safe in patients with COPD. | **Unanimity**  *1st round* | 2 | *Reference: 131* |
|  | COPD patients should receive the treatment recommended in the clinical practice guidelines regardless of whether they have depression or not. | **Consensus**  **(95.7%)**  *1st round* | 5 D | *Adapted from 10* |
|  | Patients with COPD and depression should receive psychological therapy, and pharmacological treatment if there is no improvement. | **Unanimity**  *1st round* | 1 A | *Compiled by authors*  *References: 132,133* |
|  | Patients with COPD and depression should be referred for respiratory rehabilitation. | **Consensus**  **(87%)**  *1st round* | 1 A | *Adapted from 134* |
|  | Selective serotonin reuptake inhibitors are the antidepressants of choice in COPD patients. | **Unanimity**  *1st round* | 1 A | *Compiled by authors*  *Reference: 135* |
|  | Fluvoxamine and St. John's wort must not be used in combination to treat depression in COPD patients who are receiving roflumilast or theophylline. | **Consensus**  **(82.65)**  *1st round* | 5 D | *Adapted from 10* |
|  | Anticholinergic symptoms should be monitored when anticholinergic bronchodilators are combined with monoamine oxidase inhibitors or tricyclic antidepressants. | **Unanimity**  *1st round* | 5 D | *Compiled by authors*  *Expert opinion* |
| **D) COGNITIVE DETERIORATION** | | | | |
| **Consequences of cognitive dysfunction in COPD** | | | | |
|  | Patients with COPD and dementia have a higher risk of hospital admission and longer hospital stays. | **Unanimity**  *1st round* | 3 | *References: 136,137* |
|  | The presence of cognitive impairment could be an independent risk factor for long-term mortality in COPD patients. | **Unanimity**  *1st round* | 3 | *References: 39,136,138* |
|  | The lack of evidence makes it impossible to conclude if the rate of exacerbations or quality of life in COPD patients are affected by the presence of cognitive impairment. | **Consensus**  **(85.7%)**  *2nd round* | - | **-** |
|  | Due to the its impact on progress and survival, the existence of cognitive impairment in patients with COPD should be ruled out. | **Consensus**  **(91.3%)**  *1st round* | 5D | *Compiled by authors*  *Expert opinion* |
| **Treatment of patients with COPD and cognitive impairment** | | | | |
|  | Drugs used for the treatment of cognitive impairment (acetylcholinesterase inhibitors) are safe and do not affect the standard treatment of COPD. | **Unanimity**  *1st round* | 3 | *Reference: 139* |
|  | Pulmonary rehabilitation programs partially improve cognitive function in patients with COPD. | **Consensus**  **(81%)**  *2nd round* | 2 | *References: 140-142* |
|  | COPD patients should receive the treatment recommended in the clinical practice guidelines regardless of whether they have cognitive impairment or not. | **Unanimity**  *1st round* | 5 D | *Compiled by authors*  *Expert opinion* |
|  | Patients with COPD and cognitive impairment who have hypoxemia benefit from treatment with oxygen therapy to delay the progress of cognitive impairment. | **Consensus**  **(81%)**  *2nd round* | 3 B | *Compiled by authors*  *Reference: 143* |
|  | In the event that cognitive impairment prevents the use of inhalation devices, COPD patients will use spacers or nebulization devices. | **Unanimity**  *1st round* | 5 D | *Compiled by authors*  *Expert opinion* |
|  | In patients with COPD and cognitive impairment, the use of inhalation devices will be supervised, and caregivers will also be instructed in their use. | **Consensus**  **(95.7%)**  *1st round* | 5 D | *Compiled by authors*  *Expert opinion* |

**Supplementary table 5.** Conclusions and recommendations on the clinical consequences and treatment of other comorbidities in COPD patients

| **Conclusions (C) and Recommendations (R)** | | **Final results** | **Level of evidence (LE)/Grade of evidence (GR)** | **Source** |
| --- | --- | --- | --- | --- |
| **A) PAIN** | | | | |
| **Consequences of pain in COPD** | | | | |
|  | Pain in COPD patients can occur at any disease stage and leads to a deterioration in quality of life. | **Unanimity**  *1st round* | 2 | *References: 144-146* |
|  | No studies have evaluated the possible relationship between pain and an increased likelihood of exacerbation or hospital admission in COPD patients, and no association between the presence of pain and a lower survival has been detected in these patients. | **Consensus**  **(81%)**  *2nd round* | - | - |
|  | Given that the pain affects quality of life and may be associated with a greater presence of fatigue or dyspnea, pain quantification scales are useful for the evaluation of pain and for assessing response to treatment. | **Consensus**  **(87%)**  *1st round* | 5 D | *Compiled by authors Expert opinion* |
| **Treatment of patients with COPD and pain** | | | | |
|  | The use of opioids at appropriate doses does not increase the risk of respiratory depression in COPD patients. | **Consensus**  **(85.7%)**  *2nd round* | 1 | *References:*  *147-149* |
|  | Treatments for COPD do not affect treatment for pain in any way. | **Consensus**  **(87%)**  *1st round* | - | **-** |
|  | If opioid treatment is needed in patients with COPD and pain, it should begin at 50% of the dose, and then gradually escalated, in order to achieve an adequate level of analgesia, especially in older patients. | **Consensus**  **(87%)**  *1st round* | 5 D | *Adapted from 10 Expert opinion* |
|  | Increasing the dose or frequency of drugs used in the treatment of COPD to alleviate a perceived sensation of dyspnea due to pain is not recommended, since these drugs do not improve analgesia in these patients, but side effects and drug interactions may increase. | **Consensus**  **(87%)**  *1st round* | 5 D | *Compiled by authors*  *Expert opinion* |
|  | Appropriate analgesia not only reduces the perception of pain but in some cases can also improve feelings of fatigue or dyspnea in COPD patients, so attempts should be made to achieve the best possible level of analgesia. | **Unanimity**  *1st round* | 5 D | *Compiled by authors*  *Expert opinion* |
| **B) ANEMIA** | | | | |
| **Consequences of anemia in COPD** | | | | |
|  | In COPD patients, anemia is associated with a worse quality of life, reduced exercise tolerance, and dyspnea. | **Unanimity**  *1st round* | 1 | *References: 150,151* |
|  | In COPD, anemia is associated with more hospitalizations and exacerbations. | **Consensus**  **(95.7%)**  *1st round* | 1 | *References: 151-153* |
|  | Patients with COPD and anemia have a higher rate of hospital readmission. | **Consensus**  **(95.7%)**  *1st round* | 1 | *Reference: 151* |
|  | Patients with COPD and anemia have a higher mortality rate during hospital admission, in the short and long term. | **Unanimity**  *1st round* | 1 | *References: 150,151,153-157* |
|  | Due to its impact on quality of life, hospitalizations, and survival, the presence of anemia and its etiology should be investigated in all patients with COPD. | **Consensus**  **(95.7%)**  *1st round* | 5 D | *Compiled by authors*  *Expert opinion* |
|  | In patients with COPD and anemia, the etiological treatment of anemia is recommended. | **Unanimity**  *1st round* | 5 D | *Compiled by authors*  *Expert opinion* |
| **C) OSTEOPOROSIS** | | | | |
| **Consequences of osteoporosis in COPD** | | | | |
|  | Patients with COPD and osteoporosis have a worse quality of life, more exacerbations, and higher mortality. | **Consensus**  **(87%)**  *1st round* | 2 | *References: 158,159* |
|  | Patients with COPD and osteoporosis or vertebral fractures have more exacerbations, more hospitalizations, and longer average lengths of stay. | **Consensus**  **(95.7%)**  *1st round* | 2 | *References: 160-162* |
|  | Patients with COPD and vertebral fracture have greater 2-year mortality. | **Consensus**  **(95.7%)**  *1st round* | 2 | *Reference: 162* |
|  | Patients with COPD and osteoporosis show less improvement in exercise tolerance after pulmonary rehabilitation programs than patients with other comorbidities. | **Consensus**  **(82.6%)**  *1st round* | 1 | *Reference: 163* |
|  | Due to the impact of osteoporosis on progress and survival, the existence of osteoporosis should be ruled out in COPD patients. | **Consensus**  **(87%)**  *1st round* | 5 D | *Compiled by authors*  *Expert opinion* |
|  | Due to the impact of osteoporosis on progress and survival, it is recommended that the existence of vertebral fractures in COPD patients is always ruled out with the simple procedure of performing a lateral chest X-ray. | **Consensus**  **(91.3%)**  *1st round* | 5 D | *Compiled by authors*  *Expert opinion* |
| **Treatment of patients with COPD and osteoporosis** | | | | |
|  | Systemic corticosteroids used for the treatment of COPD exacerbations increase the risk of osteoporosis. | **Unanimity**  *1st round* | 1 | *Reference: 164* |
|  | Inhaled corticosteroids used to treat COPD increase the risk of osteoporotic fractures. | **Consensus**  **(81%)**  *2nd round* | 1 | *References: 165,166* |
|  | Bisphosphonates are useful for the treatment of corticosteroid-induced osteoporosis. | **Consensus**  **(95.7%)**  *1st round* | 1 | *Reference: 167* |
|  | Pulmonary rehabilitation programs improve exercise tolerance in patients with COPD and osteoporosis. | **Consensus**  **(95.7%)**  *1st round* | 1 | *Reference: 163* |
|  | Osteoporosis in patients with COPD should be treated according to standard clinical practice guideline recommendations. | **Unanimity**  *1st round* | 5 D | *Compiled by authors*  *Expert opinion* |
|  | In patients with COPD and osteoporosis, inhaled corticosteroids must be administered at the lowest effective dose possible. | **Consensus**  **(91.3%)**  *1st round* | 1 A | *Reference: 165,166* |
|  | In patients with COPD and osteoporosis, treatment with systemic corticosteroids should be avoided if possible. If they are used, they should be administered at the lowest doses possible. | **Unanimity**  *1st round* | 1 A | *References: 164* |
|  | Patients with COPD and osteoporosis should be referred for rehabilitation. | **Consensus**  **(82.6%)**  *1st round* | 1 A | *Adapted from 163* |
| **D) GASTROESOPHAGEAL REFLUX DISEASE (GERD)** | | | | |
| **Consequences of GERD in COPD** | | | | |
|  | The presence of reflux symptoms in patients with COPD is associated with an increased frequency and severity of exacerbations, and a poorer quality of life. | **Consensus**  **(87%)**  *1st round* | 2 | *References: 168-173* |
|  | The impact of GERD on mortality in COPD patients is not well established. | **Consensus**  **(87%)**  *1st round* | - | *References: 174-177* |
|  | The presence of symptoms of GERD should be ruled out in patients with COPD. | **Consensus**  **(91.3%)**  *1st round* | 5 D | *Compiled by authors*  *Expert opinion* |
| **Treatment of patients with COPD and GERD** | | | | |
|  | COPD treatments are safe in patients with GERD. | **Consensus**  **(95.7%)**  *1st round* | 5 | *Reference: 174* |
|  | The use of high-dose omeprazole in patients with GERD and COPD does not improve airway hyperresponsiveness or lung function. | **Consensus**  **(82.6%)**  *1st round* | 5 | *Reference: 178* |
|  | Studies are needed to determine the possible benefit of drugs used in GERD in reducing the incidence of exacerbations in COPD patients. | **Consensus**  **(95.7%)**  *1st round* | 5 | *Expert opinion* |
|  | The treatment of GERD in COPD patients should follow clinical practice guidelines recommendations for GERD. | **Consensus**  **(95.7%)**  *1st round* | 5 D | *Compiled by authors*  *Expert opinion* |
| **E) THROMBOEMBOLIC DISEASE** | | | | |
| **Consequences of thromboembolic disease in COPD** | | | | |
|  | Symptoms of pulmonary embolism can be confused with those of a COPD exacerbation. | **Consensus**  **(95.7%)**  *1st round* | 5 | *Expert opinion* |
|  | Patients with COPD exacerbation and concomitant thromboembolic disease are more often admitted to the ICU and present a worse prognosis. | **Unanimity**  *1st round* | 2 | *References: 179-182* |
| **Treatment of patients with COPD and thromboembolic disease** | | | | |
|  | Prophylaxis with low molecular weight heparins is recommended in hospitalized COPD patients while they are bedridden. An alternative treatment is fondaparinux at a dose of 2.5 mg/day. Prophylaxis with low-dose low molecular weight heparins is not recommended. | **Unanimity**  *1st round* | 3 C | *Compiled by authors*  *References: 183* |
|  | In patients in whom anticoagulation is contraindicated, the use of physical measures, such as graduated compression stockings or intermittent pneumatic compression, is recommended. | **Unanimity**  *1st round* | 3 C | *Compiled by authors*  *References: 183* |
|  | Deep vein thrombosis and/or pulmonary thromboembolism in COPD patients should be treated according to standard clinical practice guideline recommendations. | **Unanimity**  *1st round* | 5 D | *Compiled by authors*  *Expert opinion* |
|  | COPD patients should receive the treatment recommended in the clinical practice guidelines regardless of whether they have deep vein thrombosis or not. | **Unanimity**  *1st round* | 5 D | *Compiled by authors*  *Expert opinion* |
| **F) CHRONIC KIDNEY DISEASE (CKD)** | | | | |
| **Consequences of CKD in COPD** | | | | |
|  | Patients with COPD and CKD have a higher mortality rate. | **Consensus**  **(95.7%)**  *1st round* | 1 | *References: 184-188* |
|  | Given the high prevalence of occult chronic kidney disease in COPD, glomerular filtration rate must always be estimated using MDRD (Modification of Diet in Renal Disease) or CKD-EPI equations | **Unanimity**  *1st round* | 1 A | *Compiled by authors*  *Reference: 189* |
| **Treatment of patients with COPD and lung cancer** | | | | |
|  | Although there is currently a lack of clinical evidence, treatment of CKD in patients with COPD appears to be safe. | **Consensus**  **(95.7%)**  *1st round* | 5 | *Expert opinion* |
|  | There is no evidence that pharmacological treatment of COPD will cause any changes in patients with CKD and COPD. | **Consensus**  **(91.3%)**  *1st round* | - | **-** |
|  | The therapeutic approach to CKD in COPD is no different from patients without COPD, so clinical practice guideline recommendations must be followed. | **Unanimity**  *1st round* | 5 D | *Adapted from: 10**References: 190,191* |
| **G) LUNG CANCER** | | | | |
| **Consequences of lung cancer in COPD** | | | | |
|  | The presence of lung cancer should be ruled out in patients with COPD who have symptoms for developing lung cancer. | **Consensus**  **(95.7%)**  *1st round* | 5 D | *Compiled by authors*  *Expert opinion* |
| **Treatment of patients with COPD and lung cancer** | | | | |
|  | The indication for surgical resectability of lung cancer may be limited by lung function decline in COPD patients. | **Unanimity**  *1st round* | 4 | *References: 192* |
|  | COPD patients should receive the treatment recommended in the clinical practice guidelines regardless of whether they have cancer or not. | **Consensus**  **(91.3%)**  *1st round* | 5 D | *Adapted from: 10* |

**Supplementary table 6.** Recommendations in divergence

| **Recommendations (R)** | | **Final results** | **Source** |
| --- | --- | --- | --- |
| **ATRIAL FIBRILLATION** | | | |
| **R30.** | The duration of use of high-dose oral corticosteroids should be **limited** in patients with COPD and atrial fibrillation who are admitted for exacerbations. | **Divergence**  **(71.4%)**  *2nd round* | *Compiled by authors*  *Reference 193* |
| **COGNITIVE DETERIORATION** | | | |
| **R51.** | Patients with COPD and cognitive impairment should be referred for rehabilitation. | **Divergence**  **(76.2%)**  *2nd round* | *Compiled by author*  *References: 140-142* |
| **PAIN** | | | |
| **R55.** | In patients with COPD and pain, nonsteroidal antiinflammatory drugs should be used in preference to opioids. | **Divergence**  **(61.9%)**  *2nd round* | *Adapted from 10 Reference: 194* |

1. Barnes P, MacNee W. *Fisiopatología celular y molecular de la EPOC.* Clinical Publishing; 2001.

2. Almagro Mena P. Rodríguez Carballeira M. Afectación extrapulmonar en la EPOC. ¿Qué es relevante y cómo debemos evaluarla. [Extrapulmonary involvement in COPD: what is relevant and how should we evaluate it?] *Med Clin (Barc).* 2011:18-23. Spanish.

3. Schols AM, Buurman WA, Staal van den Brekel AJ, Dentener MA, Wouters EF. Evidence for a relation between metabolic derangements and increased levels of inflammatory mediators in a subgroup of patients with chronic obstructive pulmonary disease. *Thorax.* 1996;51(8):819-824.

4. Garcia-Rio F, Soriano JB, Miravitlles M, et al. Impact of obesity on the clinical profile of a population-based sample with chronic obstructive pulmonary disease. *PLoS One.* 2014;9(8):e105220.

5. Cecere LM, Littman AJ, Slatore CG, et al. Obesity and COPD: associated symptoms, health-related quality of life, and medication use. *Copd.* 2011;8(4):275-284.

6. Vozoris NT, O'Donnell DE. Prevalence, risk factors, activity limitation and health care utilization of an obese, population-based sample with chronic obstructive pulmonary disease. *Can Respir J.* 2012;19(3):e18-24.

7. Cano NJ, Roth H, Court-Ortune I, et al. Nutritional depletion in patients on long-term oxygen therapy and/or home mechanical ventilation. *Eur Respir J.* 2002;20(1):30-37.

8. Curtis JR, Westfall AO, Allison J, et al. Population-based assessment of adverse events associated with long-term glucocorticoid use. *Arthritis Rheum.* 2006;55(3):420-426.

9. Yuan L, Dai X, Yang M, Cai Q, Shao N. Potential treatment benefits and safety of roflumilast in COPD: a systematic review and meta-analysis. In: *Int J Chron Obstruct Pulmon Dis.* Vol 11.2016:1477-1483.

10. Díez-Manglano J, López-García F. Protocolos: Manejo Diagnóstico y Terapéutico de las Comorbilidades en la EPOC. [Protocols: Diagnostic and Therapeutic management of Comorbidities in COPD]. *Sociedad Española de Medicina Interna (SEMI) y Elsevier SL.* 2014:1-259. Spanish.

11. Sava F, Laviolette L, Bernard S, Breton MJ, Bourbeau J, Maltais F. The impact of obesity on walking and cycling performance and response to pulmonary rehabilitation in COPD. *BMC Pulm Med.* 2010;10:55.

12. Ramachandran K, McCusker C, Connors M, Zuwallack R, Lahiri B. The influence of obesity on pulmonary rehabilitation outcomes in patients with COPD. *Chron Respir Dis.* 2008;5(4):205-209.

13. Wakabayashi K, Gonzalez MA, Delhaye C, et al. Impact of chronic obstructive pulmonary disease on acute-phase outcome of myocardial infarction. *Am J Cardiol.* 2010;106(3):305-309.

14. Grupo de Trabajo de GesEPOC. Guía de Práctica Clínica para el Diagnóstico y Tratamiento de Pacientes con Enfermedad Pulmonar Obstructiva Crónica (EPOC) – Guía Española de la EPOC (GesEPOC). Versión 2017. [Clinical Practice Guideline for the Diagnosis and Treatment of Patients with Chronic Obstructive Pulmonary Disease (COPD) - Spanish Guideline for COPD (GesEPOC). 2017 version]. *Arch Bronconeumol.* 2017;53(Suppl 1):2-64. Spanish

15. Di Daniele N. Therapeutic approaches of uncomplicated arterial hypertension in patients with COPD. *Pulm Pharmacol Ther.* 2015;35:1-7.

16. Cazzola M, Noschese P, D'Amato G, Matera MG. The pharmacologic treatment of uncomplicated arterial hypertension in patients with airway dysfunction. *Chest.* 2002;121(1):230-241.

17. Cazzola M, Noschese P, D'Amato M, D'Amato G. Comparison of the effects of single oral doses of nebivolol and celiprolol on airways in patients with mild asthma. *Chest.* 2000;118(5):1322-1326.

18. Dransfield MT, Rowe SM, Johnson JE, Bailey WC, Gerald LB. Use of beta blockers and the risk of death in hospitalised patients with acute exacerbations of COPD. *Thorax.* 2008;63(4):301-305.

19. Wacker ME, Hunger M, Karrasch S, et al. Health-related quality of life and chronic obstructive pulmonary disease in early stages - longitudinal results from the population-based KORA cohort in a working age population. *BMC Pulm Med.* 2014;14:134.

20. Janson C, Marks G, Buist S, et al. The impact of COPD on health status: findings from the BOLD study. *Eur Respir J.* 2013;42(6):1472-1483.

21. Lopez Varela MV, Montes de Oca M, Halbert R, et al. Comorbidities and health status in individuals with and without COPD in five Latin American cities: the PLATINO study. *Arch Bronconeumol.* 2013;49(11):468-474.

22. Koskela J, Kilpelainen M, Kupiainen H, et al. Co-morbidities are the key nominators of the health related quality of life in mild and moderate COPD. *BMC Pulm Med.* 2014;14:102.

23. Putcha N, Puhan MA, Hansel NN, Drummond MB, Boyd CM. Impact of co-morbidities on self-rated health in self-reported COPD: an analysis of NHANES 2001-2008. *Copd.* 2013;10(3):324-332.

24. Young RP, Hopkins RJ, Christmas T, Black PN, Metcalf P, Gamble GD. COPD prevalence is increased in lung cancer, independent of age, sex and smoking history. *Eur Respir J.* 2009;34(2):380-386.

25. Cazzola M, Bettoncelli G, Sessa E, Cricelli C, Biscione G. Prevalence of comorbidities in patients with chronic obstructive pulmonary disease. *Respiration.* 2010;80(2):112-119.

26. Gudmundsson G, Ulrik CS, Gislason T, et al. Long-term survival in patients hospitalized for chronic obstructive pulmonary disease: a prospective observational study in the Nordic countries. *Int J Chron Obstruct Pulmon Dis.* 2012;7:571-576.

27. Mannino DM, Thorn D, Swensen A, Holguin F. Prevalence and outcomes of diabetes, hypertension and cardiovascular disease in COPD. *Eur Respir J.* 2008;32(4):962-969.

28. Baker EH, Janaway CH, Philips BJ, et al. Hyperglycaemia is associated with poor outcomes in patients admitted to hospital with acute exacerbations of chronic obstructive pulmonary disease. *Thorax.* 2006;61(4):284-289.

29. Patel AR, Hurst JR. Extrapulmonary comorbidities in chronic obstructive pulmonary disease: state of the art. *Expert Rev Respir Med.* 2011;5(5):647-662.

30. Chakrabarti B, Angus RM, Agarwal S, Lane S, Calverley PM. Hyperglycaemia as a predictor of outcome during non-invasive ventilation in decompensated COPD. *Thorax.* 2009;64(10):857-862.

31. O'Byrne PM, Rennard S, Gerstein H, et al. Risk of new onset diabetes mellitus in patients with asthma or COPD taking inhaled corticosteroids. *Respir Med.* 2012;106(11):1487-1493.

32. Wood-Baker RR, Gibson PG, Hannay M, Walters EH, Walters JA. Systemic corticosteroids for acute exacerbations of chronic obstructive pulmonary disease. *Cochrane Database Syst Rev.* 2005(1):Cd001288.

33. Bruijstens LA, van Luin M, Buscher-Jungerhans PM, Bosch FH. Reality of severe metformin-induced lactic acidosis in the absence of chronic renal impairment. *Neth J Med.* 2008;66(5):185-190.

34. Jones GC, Macklin JP, Alexander WD. Contraindications to the use of metformin. *BMJ.* 2003;326(7379):4-5.

35. From the Global Strategy for the Diagnosis, Management and Prevention of COPD, Global Initiative for Chronic Obstructive Lung Disease (GOLD) 2017. Available from: <http://goldcopd.org>. In.

36. Zhang W, Zhang Y, Li CW, Jones P, Wang C, Fan Y. Effect of Statins on COPD: A Meta-Analysis of Randomized Controlled Trials. *Chest.* 2017;152(6):1159-1168.

37. Lee H, Jhun BW, Cho J, et al. Different impacts of respiratory symptoms and comorbidities on COPD-specific health-related quality of life by COPD severity. *Int J Chron Obstruct Pulmon Dis.* 2017;12:3301-3310.

38. Henoch I, Strang S, Lofdahl CG, Ekberg-Jansson A. Health-related quality of life in a nationwide cohort of patients with COPD related to other characteristics. *Eur Clin Respir J.* 2016;3:31459.

39. Almagro P, Cabrera FJ, Diez J, et al. Comorbidities and short-term prognosis in patients hospitalized for acute exacerbation of COPD: the EPOC en Servicios de medicina interna (ESMI) study. *Chest.* 2012;142(5):1126-1133.

40. Almagro P, Calbo E, Ochoa de Echaguen A, et al. Mortality after hospitalization for COPD. *Chest.* 2002;121(5):1441-1448.

41. Shah T, Churpek MM, Coca Perraillon M, Konetzka RT. Understanding why patients with COPD get readmitted: a large national study to delineate the Medicare population for the readmissions penalty expansion. *Chest.* 2015;147(5):1219-1226.

42. Jacobs DM, Noyes K, Zhao J, et al. Early Hospital Readmissions after an Acute Exacerbation of Chronic Obstructive Pulmonary Disease in the Nationwide Readmissions Database. *Ann Am Thorac Soc.* 2018;15(7):837-845.

43. Pavasini R, Tavazzi G, Biscaglia S, et al. Amino terminal pro brain natriuretic peptide predicts all-cause mortality in patients with chronic obstructive pulmonary disease: Systematic review and meta-analysis. *Chron Respir Dis.* 2017;14(2):117-126.

44. Almagro P, Lopez Garcia F, Cabrera FJ, et al. Comorbidity and gender-related differences in patients hospitalized for COPD. The ECCO study. *Respir Med.* 2010;104(2):253-259.

45. Fonarow GC, Heywood JT, Heidenreich PA, Lopatin M, Yancy CW. Temporal trends in clinical characteristics, treatments, and outcomes for heart failure hospitalizations, 2002 to 2004: findings from Acute Decompensated Heart Failure National Registry (ADHERE). *Am Heart J.* 2007;153(6):1021-1028.

46. Mentz RJ, Fiuzat M, Wojdyla DM, et al. Clinical characteristics and outcomes of hospitalized heart failure patients with systolic dysfunction and chronic obstructive pulmonary disease: findings from OPTIMIZE-HF. *Eur J Heart Fail.* 2012;14(4):395-403.

47. Matamis D, Tsagourias M, Papathanasiou A, et al. Targeting occult heart failure in intensive care unit patients with acute chronic obstructive pulmonary disease exacerbation: effect on outcome and quality of life. *J Crit Care.* 2014;29(2):315.e317-314.

48. Hawkins NM, Khosla A, Virani SA, McMurray JJ, FitzGerald JM. B-type natriuretic peptides in chronic obstructive pulmonary disease: a systematic review. *BMC Pulm Med.* 2017;17(1):11.

49. Ouanes I, Jalloul F, Ayed S, et al. N-terminal proB-type natriuretic peptide levels aid the diagnosis of left ventricular dysfunction in patients with severe acute exacerbations of chronic obstructive pulmonary disease and renal dysfunction. *Respirology.* 2012;17(4):660-666.

50. Taylor CJ, Roalfe AK, Iles R, Hobbs FD. The potential role of NT-proBNP in screening for and predicting prognosis in heart failure: a survival analysis. *BMJ Open.* 2014;4(4):e004675.

51. Macchia A, Rodriguez Moncalvo JJ, Kleinert M, et al. Unrecognised ventricular dysfunction in COPD. *Eur Respir J.* 2012;39(1):51-58.

52. Roversi S, Fabbri LM, Sin DD, Hawkins NM, Agusti A. Chronic Obstructive Pulmonary Disease and Cardiac Diseases. An Urgent Need for Integrated Care. *Am J Respir Crit Care Med.* 2016;194(11):1319-1336.

53. Lainscak M, Podbregar M, Kovacic D, Rozman J, von Haehling S. Differences between bisoprolol and carvedilol in patients with chronic heart failure and chronic obstructive pulmonary disease: a randomized trial. *Respir Med.* 2011;105 Suppl 1:S44-49.

54. Salpeter S, Ormiston T, Salpeter E. Cardioselective beta-blockers for chronic obstructive pulmonary disease. *Cochrane Database Syst Rev.* 2005(4):Cd003566.

55. Vogelmeier CF, Criner GJ, Martinez FJ, et al. Global Strategy for the Diagnosis, Management, and Prevention of Chronic Obstructive Lung Disease 2017 Report. GOLD Executive Summary. *Am J Respir Crit Care Med.* 2017;195(5):557-582.

56. Vestbo J, Anderson JA, Brook RD, et al. Fluticasone furoate and vilanterol and survival in chronic obstructive pulmonary disease with heightened cardiovascular risk (SUMMIT): a double-blind randomised controlled trial. *Lancet.* 2016;387(10030):1817-1826.

57. Samp JC, Joo MJ, Schumock GT, Calip GS, Pickard AS, Lee TA. Risk of Cardiovascular and Cerebrovascular Events in COPD Patients Treated With Long-Acting beta2-Agonist Combined With a Long-Acting Muscarinic or Inhaled Corticosteroid. *Ann Pharmacother.* 2017;51(11):945-953.

58. Baker JG, Wilcox RG. beta-Blockers, heart disease and COPD: current controversies and uncertainties. *Thorax.* 2017;72(3):271-276.

59. Miravitlles M, Soler-Cataluna JJ, Calle M, et al. Spanish Guidelines for Management of Chronic Obstructive Pulmonary Disease (GesEPOC) 2017. Pharmacological Treatment of Stable Phase. *Arch Bronconeumol.* 2017;53(6):324-335.

60. Miguel-Díez Jd, Carrasco-Garrido P, Rejas-Gutierrez J, et al. The influence of heart disease on characteristics, quality of life, use of health resources, and costs of COPD in primary care settings. *BMC Cardiovasc Disord.* 2010;10(1):8.

61. Black-Shinn JL, Kinney GL, Wise AL, et al. Cardiovascular disease is associated with COPD severity and reduced functional status and quality of life. *Copd.* 2014;11(5):546-551.

62. Patel ARC, Donaldson GC, Mackay AJ, Wedzicha JA, Hurst JR. The impact of ischemic heart disease on symptoms, health status, and exacerbations in patients with COPD. *Chest.* 2012;141(4):851-857.

63. Pizarro C, Herweg-Steffens N, Buchenroth M, et al. Invasive coronary angiography in patients with acute exacerbated COPD and elevated plasma troponin. *Int J Chron Obstruct Pulmon Dis.* 2016;11:2081-2089.

64. Soriano Ortiz JB, Almagro P, Sauleda Roig J. [Causes of mortality in COPD]. *Arch Bronconeumol.* 2009;45 Suppl 4:8-13.

65. Xia N, Wang H, Nie X. Inhaled Long-Acting beta2-Agonists Do Not Increase Fatal Cardiovascular Adverse Events in COPD: A Meta-Analysis. *PLoS One.* 2015;10(9):e0137904.

66. Wise RA, Anzueto A, Cotton D, et al. Tiotropium Respimat inhaler and the risk of death in COPD. *N Engl J Med.* 2013;369(16):1491-1501.

67. Campo G, Pavasini R, Malagù M, et al. Chronic obstructive pulmonary disease and ischemic heart disease comorbidity: overview of mechanisms and clinical management. *Cardiovasc Drugs Ther.* 2015;29(2):147-157.

68. Cazzola M, Calzetta L, Matera MG, Muscoli S, Rogliani P, Romeo F. Chronic obstructive pulmonary disease and coronary disease: COPDCoRi, a simple and effective algorithm for predicting the risk of coronary artery disease in COPD patients. *Respir Med.* 2015;109(8):1019-1025.

69. Loke YK, Kwok CS, Singh S. Risk of myocardial infarction and cardiovascular death associated with inhaled corticosteroids in COPD. *Eur Respir J.* 2010;35(5):1003-1021.

70. Manoharan A, Short PM, Anderson WJ, Lipworth BJ. Impact of long-acting bronchodilators and exposure to inhaled corticosteroids on mortality in COPD: a real-life retrospective cohort study. *Lung.* 2014;192(5):649-652.

71. Calverley PM, Anderson JA, Celli B, et al. Salmeterol and fluticasone propionate and survival in chronic obstructive pulmonary disease. *N Engl J Med.* 2007;356(8):775-789.

72. Stefan MS, Rothberg MB, Priya A, Pekow PS, Au DH, Lindenauer PK. Association between beta-blocker therapy and outcomes in patients hospitalised with acute exacerbations of chronic obstructive lung disease with underlying ischaemic heart disease, heart failure or hypertension. *Thorax.* 2012;67(11):977-984.

73. Contoli M, Campo G, Pavasini R, et al. Inhaled corticosteroid/long-acting bronchodilator treatment mitigates STEMI clinical presentation in COPD patients. *Eur J Intern Med.* 2018;47:82-86.

74. Lipson DA, Barnhart F, Brealey N, et al. Once-Daily Single-Inhaler Triple versus Dual Therapy in Patients with COPD. *N Engl J Med.* 2018;378(18):1671-1680.

75. Vestbo J, Fabbri L, Papi A, et al. Inhaled corticosteroid containing combinations and mortality in COPD. *Eur Respir J.* 2018.

76. Coiro S, Girerd N, Rossignol P, et al. Association of beta-blocker treatment with mortality following myocardial infarction in patients with chronic obstructive pulmonary disease and heart failure or left ventricular dysfunction: a propensity matched-cohort analysis from the High-Risk Myocardial Infarction Database Initiative. *Eur J Heart Fail.* 2017;19(2):271-279.

77. Du Q, Sun Y, Ding N, Lu L, Chen Y. Beta-blockers reduced the risk of mortality and exacerbation in patients with COPD: a meta-analysis of observational studies. *PLoS One.* 2014;9(11):e113048.

78. Pavasini R, Biscaglia S, d'Ascenzo F, et al. Antiplatelet Treatment Reduces All-Cause Mortality in COPD Patients: A Systematic Review and Meta-Analysis. *COPD.* 2016;13(4):509-514.

79. Mortensen EM, Copeland LA, Pugh MJ, et al. Impact of statins and ACE inhibitors on mortality after COPD exacerbations. *Respir Res.* 2009;10:45.

80. Houben-Wilke S, Jorres RA, Bals R, et al. Peripheral Artery Disease and Its Clinical Relevance in Patients with Chronic Obstructive Pulmonary Disease in the COPD and Systemic Consequences-Comorbidities Network Study. *Am J Respir Crit Care Med.* 2017;195(2):189-197.

81. Waschki B, Kirsten A, Holz O, et al. Physical activity is the strongest predictor of all-cause mortality in patients with COPD: a prospective cohort study. *Chest.* 2011;140(2):331-342.

82. van Gestel YR, Hoeks SE, Sin DD, et al. Beta-blockers and health-related quality of life in patients with peripheral arterial disease and COPD. *Int J Chron Obstruct Pulmon Dis.* 2009;4:177-183.

83. Mirault T, Galloula A, Cambou JP, et al. Impact of betablockers on general and local outcome in patients hospitalized for lower extremity peripheral artery disease: The COPART Registry. *Medicine (Baltimore).* 2017;96(5):e5916.

84. Gerhard-Herman MD, Gornik HL, Barrett C, et al. 2016 AHA/ACC Guideline on the Management of Patients With Lower Extremity Peripheral Artery Disease: Executive Summary: A Report of the American College of Cardiology/American Heart Association Task Force on Clinical Practice Guidelines. *Circulation.* 2017;135(12):e686-e725.

85. Miyazaki M, Nakamura H, Chubachi S, et al. Analysis of comorbid factors that increase the COPD assessment test scores. *Respir Res.* 2014;15:13.

86. Barrett TW, Self WH, Jenkins CA, et al. Predictors of regional variations in hospitalizations following emergency department visits for atrial fibrillation. *Am J Cardiol.* 2013;112(9):1410-1416.

87. Steer J, Gibson J, Bourke SC. The DECAF Score: predicting hospital mortality in exacerbations of chronic obstructive pulmonary disease. *Thorax.* 2012;67(11):970-976.

88. Echevarria C, Steer J, Heslop-Marshall K, et al. Validation of the DECAF score to predict hospital mortality in acute exacerbations of COPD. *Thorax.* 2016;71(2):133-140.

89. Sangwan V, Chaudhry D, Malik R. Dyspnea, Eosinopenia, Consolidation, Acidemia and Atrial Fibrillation Score and BAP-65 Score, Tools for Prediction of Mortality in Acute Exacerbations of Chronic Obstructive Pulmonary Disease: A Comparative Pilot Study. *Indian J Crit Care Med.* 2017;21(10):671-677.

90. Onishi K. Total management of chronic obstructive pulmonary disease (COPD) as an independent risk factor for cardiovascular disease. *J Cardiol.* 2017;70(2):128-134.

91. Goudis CA. Chronic obstructive pulmonary disease and atrial fibrillation: An unknown relationship. *J Cardiol.* 2017;69(5):699-705.

92. Huerta C, Lanes SF, Garcia Rodriguez LA. Respiratory medications and the risk of cardiac arrhythmias. *Epidemiology.* 2005;16(3):360-366.

93. Fuster V, Ryden LE, Cannom DS, et al. 2011 ACCF/AHA/HRS focused updates incorporated into the ACC/AHA/ESC 2006 guidelines for the management of patients with atrial fibrillation: a report of the American College of Cardiology Foundation/American Heart Association Task Force on practice guidelines. *Circulation.* 2011;123(10):e269-367.

94. Kunik ME, Roundy K, Veazey C, et al. Surprisingly high prevalence of anxiety and depression in chronic breathing disorders. *Chest.* 2005;127(4):1205-1211.

95. Ng TP, Niti M, Tan WC, Cao Z, Ong KC, Eng P. Depressive symptoms and chronic obstructive pulmonary disease: effect on mortality, hospital readmission, symptom burden, functional status, and quality of life. *Arch Intern Med.* 2007;167(1):60-67.

96. Maurer J, Rebbapragada V, Borson S, et al. Anxiety and depression in COPD: current understanding, unanswered questions, and research needs. *Chest.* 2008;134(4 Suppl):43s-56s.

97. Eisner MD, Blanc PD, Yelin EH, et al. Influence of anxiety on health outcomes in COPD. *Thorax.* 2010;65(3):229-234.

98. Atlantis E, Fahey P, Cochrane B, Smith S. Bidirectional associations between clinically relevant depression or anxiety and COPD: a systematic review and meta-analysis. *Chest.* 2013;144(3):766-777.

99. Blakemore A, Dickens C, Guthrie E, et al. Depression and anxiety predict health-related quality of life in chronic obstructive pulmonary disease: systematic review and meta-analysis. *Int J Chron Obstruct Pulmon Dis.* 2014;9:501-512.

100. Willgoss TG, Yohannes AM. Anxiety disorders in patients with COPD: a systematic review. *Respir Care.* 2013;58(5):858-866.

101. von Leupoldt A, Kenn K. The psychology of chronic obstructive pulmonary disease. *Curr Opin Psychiatry.* 2013;26(5):458-463.

102. Qian J, Simoni-Wastila L, Rattinger GB, et al. Association between depression and maintenance medication adherence among Medicare beneficiaries with chronic obstructive pulmonary disease. *Int J Geriatr Psychiatry.* 2014;29(1):49-57.

103. Papaioannou AI, Bartziokas K, Tsikrika S, et al. The impact of depressive symptoms on recovery and outcome of hospitalised COPD exacerbations. *Eur Respir J.* 2013;41(4):815-823.

104. Laurin C, Moullec G, Bacon SL, Lavoie KL. Impact of anxiety and depression on chronic obstructive pulmonary disease exacerbation risk. *Am J Respir Crit Care Med.* 2012;185(9):918-923.

105. Cafarella PA, Effing TW, Usmani ZA, Frith PA. Treatments for anxiety and depression in patients with chronic obstructive pulmonary disease: a literature review. *Respirology.* 2012;17(4):627-638.

106. Bakas T, McLennon SM, Carpenter JS, et al. Systematic review of health-related quality of life models. *Health Qual Life Outcomes.* 2012;10:134.

107. Cavailles A, Brinchault-Rabin G, Dixmier A, et al. Comorbidities of COPD. *Eur Respir Rev.* 2013;22(130):454-475.

108. Dursunoglu N, Kokturk N, Baha A, et al. Comorbidities and their impact on chronic obstructive pulmonary disease. *Tuberk Toraks.* 2016;64(4):289-298.

109. Volpato E, Banfi P, Rogers SM, Pagnini F. Relaxation Techniques for People with Chronic Obstructive Pulmonary Disease: A Systematic Review and a Meta-Analysis. *Evid Based Complement Alternat Med.* 2015;2015:628365.

110. Depression in adults: recognition and management | Guidance and guidelines | NICE. NICE. <https://www.nice.org.uk/guidance/cg90>. Published 2018. Accessed.

111. Alexopoulos GS, Sirey JA, Raue PJ, Kanellopoulos D, Clark TE, Novitch RS. Outcomes of depressed patients undergoing inpatient pulmonary rehabilitation. *Am J Geriatr Psychiatry.* 2006;14(5):466-475.

112. Emery CF, Shermer RL, Hauck ER, Hsiao ET, MacIntyre NR. Cognitive and psychological outcomes of exercise in a 1-year follow-up study of patients with chronic obstructive pulmonary disease. *Health Psychol.* 2003;22(6):598-604.

113. Garuti G, Cilione C, Dell'Orso D, et al. Impact of comprehensive pulmonary rehabilitation on anxiety and depression in hospitalized COPD patients. *Monaldi Arch Chest Dis.* 2003;59(1):56-61.

114. Nunes DM, Mota RM, de Pontes Neto OL, Pereira ED, de Bruin VM, de Bruin PF. Impaired sleep reduces quality of life in chronic obstructive pulmonary disease. *Lung.* 2009;187(3):159-163.

115. Scharf SM, Maimon N, Simon-Tuval T, Bernhard-Scharf BJ, Reuveni H, Tarasiuk A. Sleep quality predicts quality of life in chronic obstructive pulmonary disease. *Int J Chron Obstruct Pulmon Dis.* 2010;6:1-12.

116. Omachi TA, Blanc PD, Claman DM, et al. Disturbed sleep among COPD patients is longitudinally associated with mortality and adverse COPD outcomes. *Sleep Med.* 2012;13(5):476-483.

117. Vozoris NT, Fischer HD, Wang X, et al. Benzodiazepine use among older adults with chronic obstructive pulmonary disease: a population-based cohort study. *Drugs Aging.* 2013;30(3):183-192.

118. Vozoris NT, Fischer HD, Wang X, et al. Benzodiazepine drug use and adverse respiratory outcomes among older adults with COPD. *Eur Respir J.* 2014;44(2):332-340.

119. Chung WS, Lai CY, Lin CL, Kao CH. Adverse Respiratory Events Associated With Hypnotics Use in Patients of Chronic Obstructive Pulmonary Disease: A Population-Based Case-Control Study. *Medicine (Baltimore).* 2015;94(27):e1110.

120. McNicholas WT, Calverley PM, Lee A, Edwards JC. Long-acting inhaled anticholinergic therapy improves sleeping oxygen saturation in COPD. *Eur Respir J.* 2004;23(6):825-831.

121. Ryan S, Doherty LS, Rock C, Nolan GM, McNicholas WT. Effects of salmeterol on sleeping oxygen saturation in chronic obstructive pulmonary disease. *Respiration.* 2010;79(6):475-481.

122. Donohue JF, Fogarty C, Lotvall J, et al. Once-daily bronchodilators for chronic obstructive pulmonary disease: indacaterol versus tiotropium. *Am J Respir Crit Care Med.* 2010;182(2):155-162.

123. Kornmann O, Dahl R, Centanni S, et al. Once-daily indacaterol versus twice-daily salmeterol for COPD: a placebo-controlled comparison. *Eur Respir J.* 2011;37(2):273-279.

124. Huber MB, Wacker ME, Vogelmeier CF, Leidl R. Comorbid Influences on Generic Health-Related Quality of Life in COPD: A Systematic Review. *PLoS One.* 2015;10(7):e0132670.

125. Salte K, Titlestad I, Halling A. Depression is associated with poor prognosis in patients with chronic obstructive pulmonary disease - a systematic review. *Dan Med J.* 2015;62(10):A5137.

126. Ng TP, Niti M, Fones C, Yap KB, Tan WC. Co-morbid association of depression and COPD: a population-based study. *Respir Med.* 2009;103(6):895-901.

127. Al-shair K, Dockry R, Mallia-Milanes B, Kolsum U, Singh D, Vestbo J. Depression and its relationship with poor exercise capacity, BODE index and muscle wasting in COPD. *Respir Med.* 2009;103(10):1572-1579.

128. Keating A, Lee A, Holland AE. What prevents people with chronic obstructive pulmonary disease from attending pulmonary rehabilitation? A systematic review. *Chron Respir Dis.* 2011;8(2):89-99.

129. Eiser N, Harte R, Spiros K, Phillips C, Isaac MT. Effect of treating depression on quality-of-life and exercise tolerance in severe COPD. *Copd.* 2005;2(2):233-241.

130. Albrecht JS, Khokhar B, Huang TY, et al. Adherence and healthcare utilization among older adults with COPD and depression. *Respir Med.* 2017;129:53-58.

131. Yohannes AM, Alexopoulos GS. Pharmacological treatment of depression in older patients with chronic obstructive pulmonary disease: impact on the course of the disease and health outcomes. *Drugs Aging.* 2014;31(7):483-492.

132. Coventry PA, Bower P, Keyworth C, et al. The effect of complex interventions on depression and anxiety in chronic obstructive pulmonary disease: systematic review and meta-analysis. *PLoS One.* 2013;8(4):e60532.

133. Smith SM, Sonego S, Ketcheson L, Larson JL. A review of the effectiveness of psychological interventions used for anxiety and depression in chronic obstructive pulmonary disease. *BMJ Open Respir Res.* 2014;1(1):e000042.

134. Tselebis A, Pachi A, Ilias I, et al. Strategies to improve anxiety and depression in patients with COPD: a mental health perspective. *Neuropsychiatr Dis Treat.* 2016;12:297-328.

135. Fritzsche A, Clamor A, von Leupoldt A. Effects of medical and psychological treatment of depression in patients with COPD--a review. *Respir Med.* 2011;105(10):1422-1433.

136. Chang SS, Chen S, McAvay GJ, Tinetti ME. Effect of coexisting chronic obstructive pulmonary disease and cognitive impairment on health outcomes in older adults. *J Am Geriatr Soc.* 2012;60(10):1839-1846.

137. Dodd JW, Charlton RA, van den Broek MD, Jones PW. Cognitive dysfunction in patients hospitalized with acute exacerbation of COPD. *Chest.* 2013;144(1):119-127.

138. Raffaele A-I, Andrea C, Claudio P, et al. Drawing impairment predicts mortality in severe COPD. *Chest.* 2006;130(6):1687-1694.

139. Stephenson A, Seitz DP, Fischer HD, et al. Cholinesterase inhibitors and adverse pulmonary events in older people with chronic obstructive pulmonary disease and concomitant dementia: a population-based, cohort study. *Drugs Aging.* 2012;29(3):213-223.

140. Pereira ED, Viana CS, Taunay TC, Sales PU, Lima JW, Holanda MA. Improvement of cognitive function after a three-month pulmonary rehabilitation program for COPD patients. *Lung.* 2011;189(4):279-285.

141. Kozora E, Tran ZV, Make B. Neurobehavioral improvement after brief rehabilitation in patients with chronic obstructive pulmonary disease. *J Cardiopulm Rehabil.* 2002;22(6):426-430.

142. Kenn K, Gloeckl R, Soennichsen A, et al. Predictors of success for pulmonary rehabilitation in patients awaiting lung transplantation. *Transplantation.* 2015;99(5):1072-1077.

143. Thakur N, Blanc PD, Julian LJ, et al. COPD and cognitive impairment: the role of hypoxemia and oxygen therapy. *Int J Chron Obstruct Pulmon Dis.* 2010;5:263-269.

144. Lohne V, Heer HC, Andersen M, Miaskowski C, Kongerud J, Rustoen T. Qualitative study of pain of patients with chronic obstructive pulmonary disease. *Heart Lung.* 2010;39(3):226-234.

145. HajGhanbari B, Holsti L, Road JD, Darlene Reid W. Pain in people with chronic obstructive pulmonary disease (COPD). *Respir Med.* 2012;106(7):998-1005.

146. HajGhanbari B, Yamabayashi C, Reid DW. The relationship between pain and comorbid health conditions in people with chronic obstructive pulmonary disease. *Cardiopulm Phys Ther J.* 2014;25(1):29-35.

147. Ekstrom MP, Bornefalk-Hermansson A, Abernethy AP, Currow DC. Safety of benzodiazepines and opioids in very severe respiratory disease: national prospective study. *BMJ.* 2014;348:g445.

148. Verberkt CA, van den Beuken-van Everdingen MHJ, Schols J, et al. Respiratory adverse effects of opioids for breathlessness: a systematic review and meta-analysis. *Eur Respir J.* 2017;50(5).

149. Ekstrom M, Bajwah S, Bland JM, Currow DC, Hussain J, Johnson MJ. One evidence base; three stories: do opioids relieve chronic breathlessness? *Thorax.* 2018;73(1):88-90.

150. Cote C, Zilberberg MD, Mody SH, Dordelly LJ, Celli B. Haemoglobin level and its clinical impact in a cohort of patients with COPD. *Eur Respir J.* 2007;29(5):923-929.

151. Vasquez A, Logomarsino JV. Anemia in Chronic Obstructive Pulmonary Disease and the Potential Role of Iron Deficiency. *Copd.* 2016;13(1):100-109.

152. Barba R, de Casasola GG, Marco J, et al. Anemia in chronic obstructive pulmonary disease: a readmission prognosis factor. *Curr Med Res Opin.* 2012;28(4):617-622.

153. Halpern MT, Zilberberg MD, Schmier JK, Lau EC, Shorr AF. Anemia, costs and mortality in chronic obstructive pulmonary disease. *Cost Eff Resour Alloc.* 2006;4:17.

154. Haja Mydin H, Murphy S, Clague H, Sridharan K, Taylor IK. Anemia and performance status as prognostic markers in acute hypercapnic respiratory failure due to chronic obstructive pulmonary disease. *Int J Chron Obstruct Pulmon Dis.* 2013;8:151-157.

155. Martinez-Rivera C, Portillo K, Munoz-Ferrer A, et al. Anemia is a mortality predictor in hospitalized patients for COPD exacerbation. *Copd.* 2012;9(3):243-250.

156. Rasmussen L, Christensen S, Lenler-Petersen P, Johnsen SP. Anemia and 90-day mortality in COPD patients requiring invasive mechanical ventilation. *Clin Epidemiol.* 2010;3:1-5.

157. Chambellan A, Chailleux E, Similowski T. Prognostic value of the hematocrit in patients with severe COPD receiving long-term oxygen therapy. *Chest.* 2005;128(3):1201-1208.

158. Lee SH, Kwon HY. Prevalence of Osteoporosis in Korean Patients with Chronic Obstructive Pulmonary Disease and Their Health-related Quality of Life According to the Korea National Health and Nutrition Examination Survey 2008-2011. *J Bone Metab.* 2017;24(4):241-248.

159. Lin CW, Chen YY, Chen YJ, Liang CY, Lin MS, Chen W. Prevalence, risk factors, and health-related quality of life of osteoporosis in patients with COPD at a community hospital in Taiwan. *Int J Chron Obstruct Pulmon Dis.* 2015;10:1493-1500.

160. Malinovschi A, Masoero M, Bellocchia M, et al. Severe vitamin D deficiency is associated with frequent exacerbations and hospitalization in COPD patients. *Respir Res.* 2014;15:131.

161. Romme EA, Murchison JT, Edwards LD, et al. CT-measured bone attenuation in patients with chronic obstructive pulmonary disease: relation to clinical features and outcomes. *J Bone Miner Res.* 2013;28(6):1369-1377.

162. Pascual-Guardia S, Badenes-Bonet D, Martin-Ontiyuelo C, et al. Hospital admissions and mortality in patients with COPD exacerbations and vertebral body compression fractures. *Int J Chron Obstruct Pulmon Dis.* 2017;12:1837-1845.

163. Hornikx M, Van Remoortel H, Demeyer H, et al. The influence of comorbidities on outcomes of pulmonary rehabilitation programs in patients with COPD: a systematic review. *Biomed Res Int.* 2013;2013:146148.

164. Amiche MA, Albaum JM, Tadrous M, et al. Fracture risk in oral glucocorticoid users: a Bayesian meta-regression leveraging control arms of osteoporosis clinical trials. *Osteoporos Int.* 2016;27(5):1709-1718.

165. Mattishent K, Thavarajah M, Blanco P, Gilbert D, Wilson AM, Loke YK. Meta-review: adverse effects of inhaled corticosteroids relevant to older patients. *Drugs.* 2014;74(5):539-547.

166. Loke YK, Cavallazzi R, Singh S. Risk of fractures with inhaled corticosteroids in COPD: systematic review and meta-analysis of randomised controlled trials and observational studies. *Thorax.* 2011;66(8):699-708.

167. Allen CS, Yeung JH, Vandermeer B, Homik J. Bisphosphonates for steroid-induced osteoporosis. *Cochrane Database Syst Rev.* 2016;10:Cd001347.

168. Hurst JR, Vestbo J, Anzueto A, et al. Susceptibility to exacerbation in chronic obstructive pulmonary disease. *N Engl J Med.* 2010;363(12):1128-1138.

169. Rizkallah J, Man SFP, Sin DD. Prevalence of pulmonary embolism in acute exacerbations of COPD: a systematic review and metaanalysis. *Chest.* 2009;135(3):786-793.

170. Terada K, Muro S, Sato S, et al. Impact of gastro-oesophageal reflux disease symptoms on COPD exacerbation. *Thorax.* 2008;63(11):951-955.

171. Takada K, Matsumoto S, Kojima E, et al. Prospective evaluation of the relationship between acute exacerbations of COPD and gastroesophageal reflux disease diagnosed by questionnaire. *Respir Med.* 2011;105(10):1531-1536.

172. Ingebrigtsen TS, Marott JL, Vestbo J, Nordestgaard BG, Hallas J, Lange P. Gastro-esophageal reflux disease and exacerbations in chronic obstructive pulmonary disease. *Respirology.* 2015;20(1):101-107.

173. Martinez CH, Okajima Y, Murray S, et al. Impact of self-reported gastroesophageal reflux disease in subjects from COPDGene cohort. *Respir Res.* 2014;15(1):62.

174. López García F, Pasquau Liaño F. Enfermedades digestivas y enfermedad pulmonar obstructiva crónica. [Digestive diseases and chronic obstructive pulmonary disease]. Med Clin (Barc). 2010;11:13-6. In. Spanish.

175. Garcia Rodriguez LA, Ruigomez A, Martin-Merino E, Johansson S, Wallander MA. Relationship between gastroesophageal reflux disease and COPD in UK primary care. *Chest.* 2008;134(6):1223-1230.

176. Sakae TM, Pizzichini MM, Teixeira PJ, Silva RM, Trevisol DJ, Pizzichini E. Exacerbations of COPD and symptoms of gastroesophageal reflux: a systematic review and meta-analysis. *J Bras Pneumol.* 2013;39(3):259-271.

177. Kim J, Lee JH, Kim Y, et al. Association between chronic obstructive pulmonary disease and gastroesophageal reflux disease: a national cross-sectional cohort study. *BMC Pulm Med.* 2013;13:51.

178. Poe RH, Kallay MC. Chronic cough and gastroesophageal reflux disease: experience with specific therapy for diagnosis and treatment. *Chest.* 2003;123(3):679-684.

179. Gunen H, Gulbas G, In E, Yetkin O, Hacievliyagil SS. Venous thromboemboli and exacerbations of COPD. *Eur Respir J.* 2010;35(6):1243-1248.

180. Wang TS, Mao YM, Sun YM, Lou YJ. [Pulmonary embolism in patients with chronic obstructive pulmonary disease exacerbations of unknown origin: clinical characteristics and risk factors]. *Zhonghua Jie He He Hu Xi Za Zhi.* 2012;35(4):259-263.

181. Duan SC, Yang YH, Li XY, et al. Prevalence of deep venous thrombosis in patients with acute exacerbation of chronic obstructive pulmonary disease. *Chin Med J (Engl).* 2010;123(12):1510-1514.

182. Bertoletti L, Quenet S, Laporte S, et al. Pulmonary embolism and 3-month outcomes in 4036 patients with venous thromboembolism and chronic obstructive pulmonary disease: data from the RIETE registry. *Respir Res.* 2013;14:75.

183. Fraisse F, Holzapfel L, Couland JM, et al. Nadroparin in the prevention of deep vein thrombosis in acute decompensated COPD. The Association of Non-University Affiliated Intensive Care Specialist Physicians of France. *Am J Respir Crit Care Med.* 2000;161(4 Pt 1):1109-1114.

184. Singanayagam A, Schembri S, Chalmers JD. Predictors of mortality in hospitalized adults with acute exacerbation of chronic obstructive pulmonary disease. *Ann Am Thorac Soc.* 2013;10(2):81-89.

185. van Gestel YR, Chonchol M, Hoeks SE, et al. Association between chronic obstructive pulmonary disease and chronic kidney disease in vascular surgery patients. *Nephrol Dial Transplant.* 2009;24(9):2763-2767.

186. Hasegawa W, Yamauchi Y, Yasunaga H, et al. Factors affecting mortality following emergency admission for chronic obstructive pulmonary disease. *BMC Pulm Med.* 2014;14:151.

187. Fabbian F, De Giorgi A, Manfredini F, et al. Impact of renal dysfunction on in-hospital mortality of patients with severe chronic obstructive pulmonary disease: a single-center Italian study. *Int Urol Nephrol.* 2016;48(7):1121-1127.

188. Fedeli U, De Giorgi A, Gennaro N, et al. Lung and kidney: a dangerous liaison? A population-based cohort study in COPD patients in Italy. *Int J Chron Obstruct Pulmon Dis.* 2017;12:443-450.

189. Rashiq S, Dick BD. Factors associated with chronic noncancer pain in the Canadian population. *Pain Res Manag.* 2009;14(6):454-460.

190. Alcazar R, Egocheaga MI, Orte L, et al. [SEN-SEMFYC consensus document on chronic kidney disease]. *Nefrologia.* 2008;28(3):273-282.

191. Incalzi RA, Corsonello A, Pedone C, Battaglia S, Paglino G, Bellia V. Chronic renal failure: a neglected comorbidity of COPD. *Chest.* 2010;137(4):831-837.

192. Lim E, Baldwin D, Beckles M, et al. Guidelines on the radical management of patients with lung cancer. *Thorax.* 2010;65 Suppl 3:iii1-27.

193. van der Hooft CS, Heeringa J, Brusselle GG, et al. Corticosteroids and the risk of atrial fibrillation. *Arch Intern Med.* 2006;166(9):1016-1020.

194. Gruber EM, Tschernko EM. Anaesthesia and postoperative analgesia in older patients with chronic obstructive pulmonary disease: special considerations. *Drugs Aging.* 2003;20(5):347-360.
